# Supplementary material
Source: Royal Society of Chemistry journal article supplement (doi:10.1039/d6an00351f)
Supplement: d6an00351f1.pdf [file d6an00351f1.pdf]

Supporting information for the article:

**A sensitive electrochemical sensor with Hf-MOF@activated Ketjen black/calix[4]arene composite for the detection of 2,2'-methylenebis(4-chlorophenol) in environmental water**

Yu Xie<sup>a, b, c, †</sup>, Jingwen Meng<sup>a, †</sup>, Zhijie Zhu<sup>a</sup>, Genhe He<sup>b</sup>, Ronghua Hu<sup>a</sup>, Xiuguang Yi<sup>a, \*</sup>, Kalle Salminen<sup>c, \*</sup>

<sup>a</sup> Key Laboratory of Jiangxi Province for Special Optoelectronic Artificial Crystal Materials, Institute of Applied Chemistry, College of Chemistry and Chemical Engineering, Jingtangshan University, Ji'an, 343009, China

<sup>b</sup> School of Life Sciences, Key Laboratory of Jiangxi Province for Biological Invasion and Biosecurity, Ji'an 343009 Jiangxi, China

<sup>c</sup> Ministry of Education Key Laboratory for Analytical Science of Food Safety and Biology, College of Chemistry, Fuzhou University, Fuzhou, 350116, China.

\*Corresponding Author: (+86) 0796-8106055

\*E-mail: 9920080008@jgsu.edu.cn (X.-G. Yi), kalle.salminen@alumni.aalto.fi (K. Salminen)

† Y.X. and J.W.M. contributed equally to this work

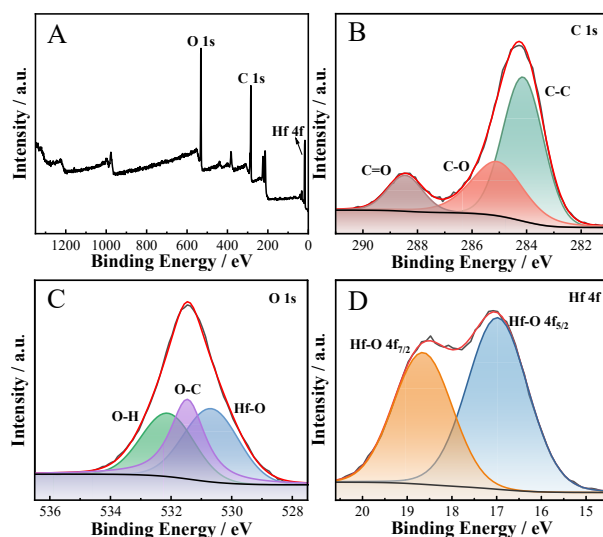

**Fig. S1.** XPS analysis of Hf-MOF@a-KB/Calix: (A) Survey scan, (B) C 1s, (C) O 1s, and (D) Hf 4f spectra.

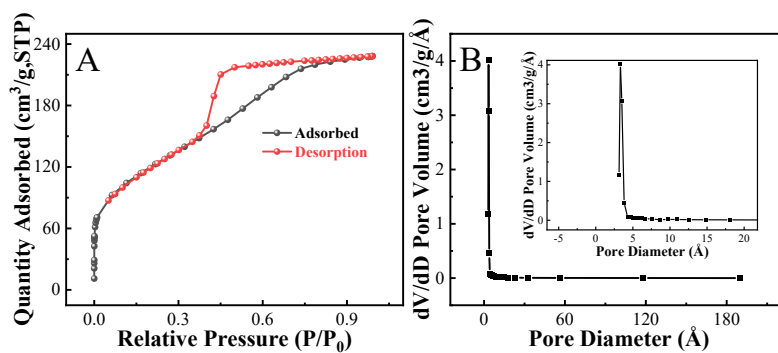

**Fig. S2.** N<sub>2</sub> adsorption-desorption isotherm (A) and pore size distribution (B) of Hf-MOF@a-KB/Calix/GCE

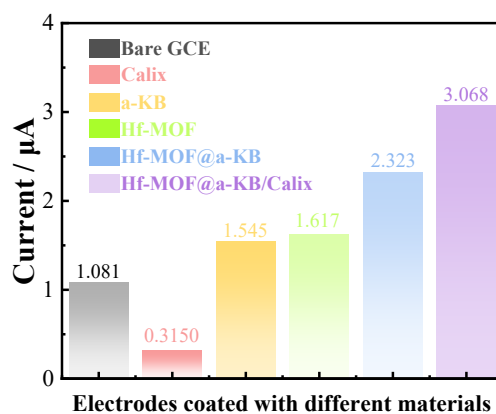

**Fig. S3.** The bar chart of the CV response curve of bare GCE, Calix/GCE, a-KB/GCE, Hf-MOF/GCE and Hf-MOF@a-KB/Calix/GCE

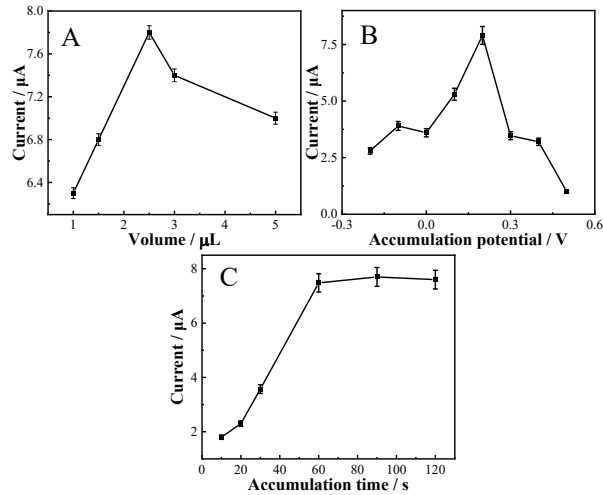

**Fig. S4.** (A) Effect of different modification volumes of Hf-MOF@a-KB/Calix material in 0.1 M PBS (pH 7.0), Effects of (B) accumulation potential and (C) accumulation time on the detection of 10  $\mu\text{M}$  Dcp.

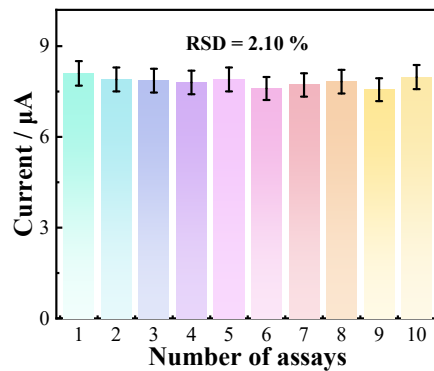

**Fig. S5.** SWV responses of 10 consecutive determinations of 10.0  $\mu\text{M}$  Dcp

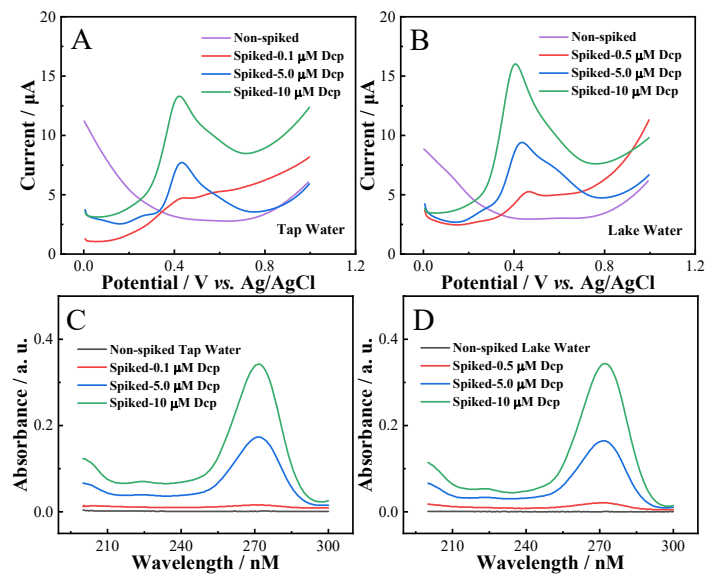

**Fig. S6.** The SWV curves of Hf-MOF@a-CB/Calix/GCE in tap water (A) (spiked with 0.1, 5.0, and

10  $\mu\text{M}$  Dcp) and lake water (B) (spiked with 0.5, 5.0, and 10  $\mu\text{M}$  Dcp) under non-spiked and spiked conditions, and the corresponding UV-Vis absorbance spectra of the same samples in lake water (C) and tap water (D).

**Table S1.** BET surface area and pore structure parameters of Hf-MOF@a-KB/Calix.

| Sample            | $S_{\text{BET}}/\text{m}^2 \text{ g}^{-1}$ | $V_{\text{total}}/\text{cm}^3 \text{ g}^{-1}$ | $D_{\text{avg}} / \text{nm}$ |
|-------------------|--------------------------------------------|-----------------------------------------------|------------------------------|
| Hf-MOF@a-KB/Calix | 422.36                                     | 0.353                                         | 3.34                         |

**Table S2.**  $R_s$ ,  $R_{ct}$  and  $k_s$  values for different modified electrodes simulated from equivalent circuits.

| Electrode             | $R_s (\Omega)$ | $R_{ct} (\Omega)$ | $k_s(\text{cm/s})$    |
|-----------------------|----------------|-------------------|-----------------------|
| Bare GCE              | 28.23          | 1355              | $6.94 \times 10^{-9}$ |
| Calix/GCE             | 52             | 2395              | $3.93 \times 10^{-9}$ |
| Hf-MOF/GCE            | 29.55          | 276.4             | $3.40 \times 10^{-8}$ |
| a-KB/GCE              | 26.86          | 174               | $5.41 \times 10^{-8}$ |
| Hf-MOF@a-KB/Calix/GCE | 13.43          | 157.9             | $5.96 \times 10^{-8}$ |

**Table S3** The matrix effect evaluation of the sensor in tap water and lake water samples (n=3)

| Added<br>( $\mu\text{M}$ ) | $I_{\text{PBS}}$<br>( $\mu\text{A}$ ) | $I_{\text{Tap water}}$<br>( $\mu\text{A}$ ) | $I_{\text{Lake water}}$<br>( $\mu\text{A}$ ) | $\text{ME}_{\text{Tap water}}$<br>(%) | $\text{ME}_{\text{Lake water}}$<br>(%) |
|----------------------------|---------------------------------------|---------------------------------------------|----------------------------------------------|---------------------------------------|----------------------------------------|
| 0.5                        | 1.18                                  | 1.29                                        | 1.25                                         | 105.2                                 | 101.6                                  |
| 5.0                        | 4.03                                  | 3.35                                        | 4.73                                         | 83.1                                  | 117.3                                  |
| 10                         | 7.44                                  | 6.18                                        | 7.54                                         | 83.0                                  | 101.3                                  |
